# Supplementary material
Source: publisher figshare collection journal article supplement (https://acs.figshare.com/ndownloader/files/3868351)
Supplement: Supplementary file 1 [file 3868351]

## Sheet: 工作表1
Ranking	FDA approved drugs	Docking score (kcal/mol)					Commercially available	% FABP4 inhibition (10 μM)	Medical uses
		2NNQ	1TOU	1TOW	3FR5	Average
1	Paliperidone	-10.9	-11.1	-10.8	-10.3	-10.8	Yes	5.12±6.90	antipsychotic drug
2	Risperidone	-10.5	-10.9	-10.6	-10.1	-10.5	Yes	1.64±12.90	antipsychotic drug
3	Fluorescein	-10.2	-10.3	-10.7	-10.1	-10.3	No	ND	fluorescent tracer
4	Pimozide	-10.9	-10	-9.4	-10.5	-10.2	Yes	46.98±11.34	antipsychotic drug
5	Ketazolam	-9.9	-10.4	-10.8	-9.6	-10.2	No	ND	antipsychotic and antispasmodic drug
6	Levofloxacin	-10.7	-9.8	-10	-9.9	-10.1	Yes	70.01±12.15	broad spectrum antibiotics
7	Trovafloxacin	-10.6	-10	-9.3	-10.4	-10.1	Yes	57.46±12.18	broad spectrum antibiotics
8	Darifenacin	-9.8	-10	-10.5	-9.8	-10	No	ND	treat urinary incontinence
9	Antrafenine	-10.8	-9.6	-8.5	-10.6	-9.9	No	ND	analgesic and anti-inflammatory drug
10	Fosaprepitant	-10.2	-9.9	-9.6	-9.8	-9.9	No	ND	antiemetic drug
